# Supplementary material for: Multimodal detection of protein isoforms and nucleic acids from mouse pre-implantation embryos
Source: Springer Nature journal article supplement (doi:10.1038/s41596-020-00449-2), 2021-01-15
Supplement: MOESM1 [file 41596_2020_449_MOESM1_ESM20.pdf]

---

**Supplementary information**

---

**Multimodal detection of protein isoforms  
and nucleic acids from mouse pre-  
implantation embryos**

---

In the format provided by the  
authors and unedited

Multimodal detection of protein isoforms and nucleic acids from mouse preimplantation embryos

Elisabet Rosàs-Canyelles, Andrew J. Modzelewski, Alisha Geldert, Lin He, Amy E. Herr

Supplementary Information

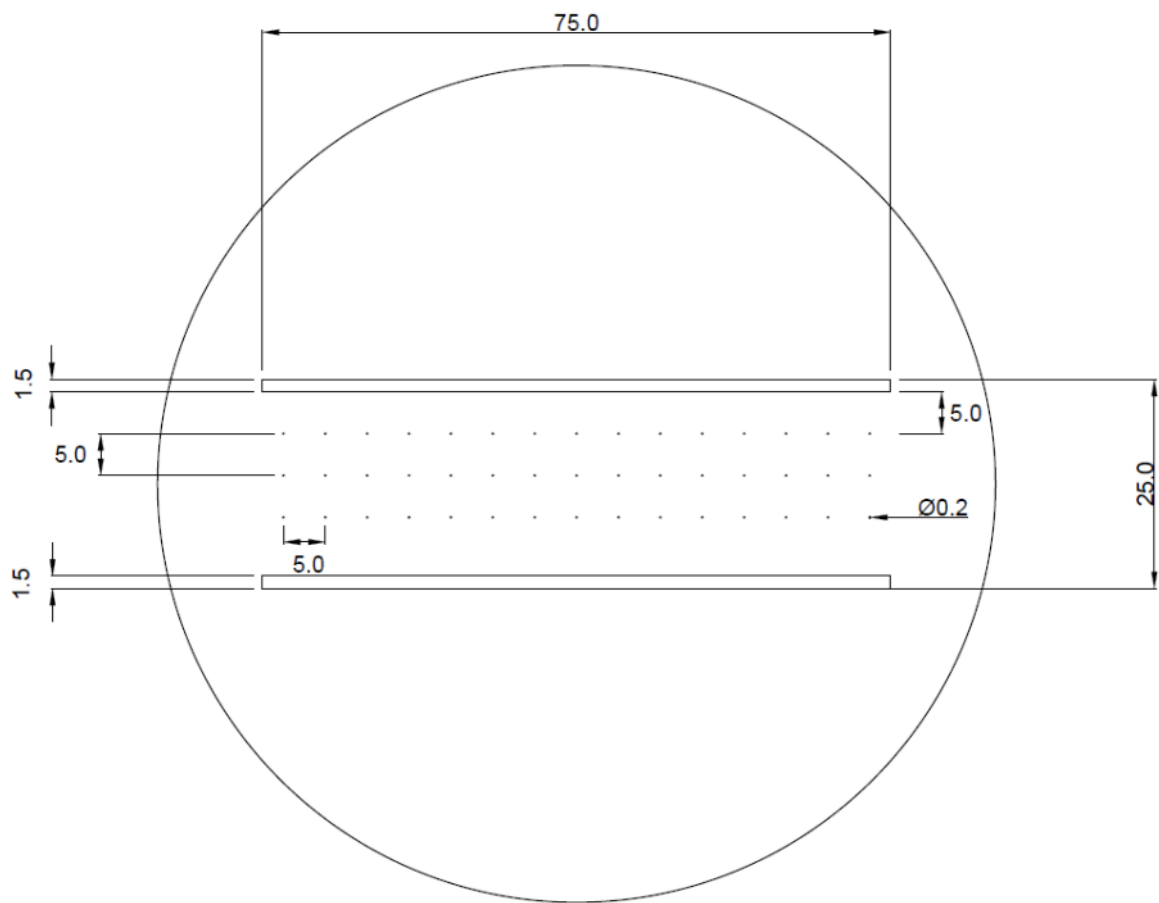

|                                                                                   |  |                |
|-----------------------------------------------------------------------------------|--|----------------|
| TITLE                                                                             |  |                |
| SU-8 SI WAFER MOLD                                                                |  |                |
| COMMENTS:<br>DIMENSIONS ARE IN MILLIMETERS<br>FEATURES ARE 0.200 MILLIMETERS TALL |  | VERSION<br>1.0 |
| SCALE 1:1                                                                         |  | SHEET 1 OF 1   |

Supplementary Figure 1: Dimensioned drawing of micro-post array on silicon/SU-8 wafer.

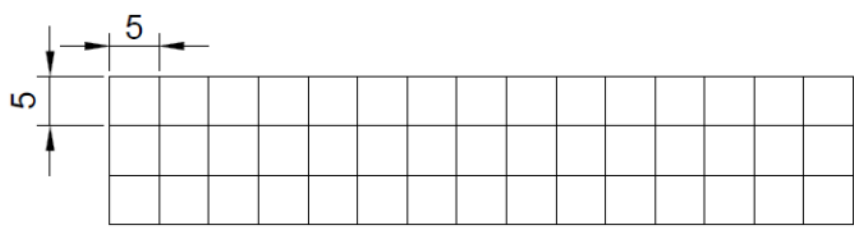

|                                            |  |                |
|--------------------------------------------|--|----------------|
| TITLE                                      |  |                |
| CUTTING GRID LAYOUT                        |  |                |
| COMMENTS:<br>DIMENSIONS ARE IN MILLIMETERS |  | VERSION<br>1.0 |
| SCALE 1:1                                  |  | SHEET 1 OF 1   |

Supplementary Figure 2: Dimensioned drawing for engraving an acrylic sheet to make the cutting grid.

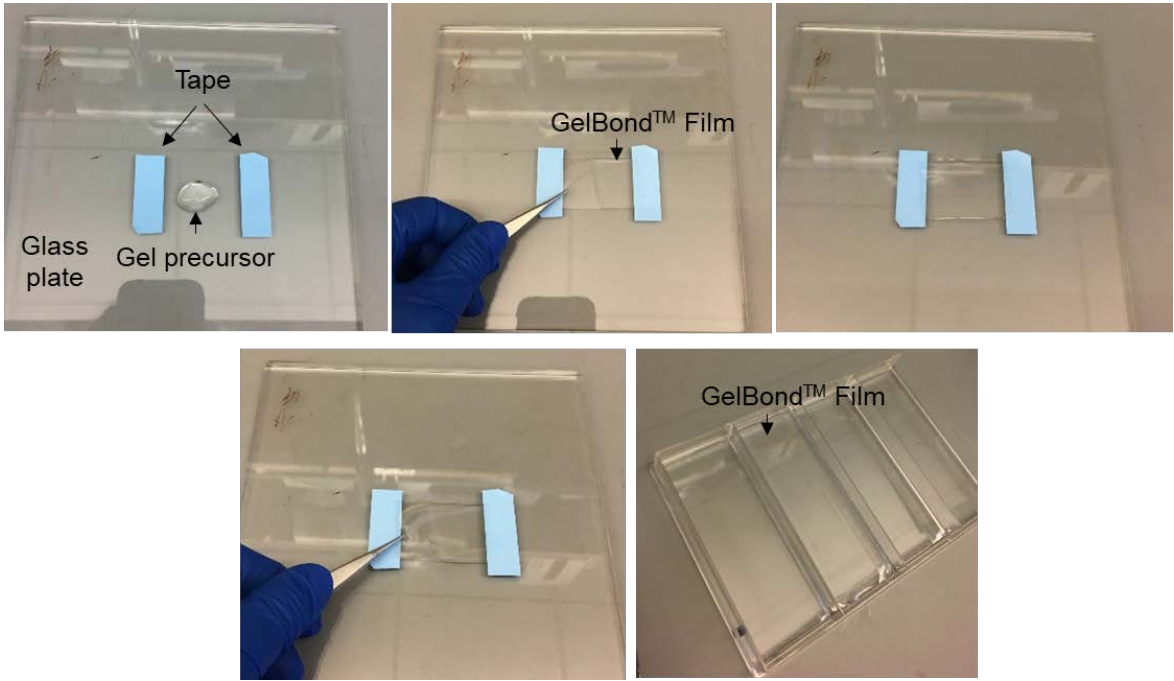

Supplementary Figure 3: Fabrication of auxiliary blank gel.

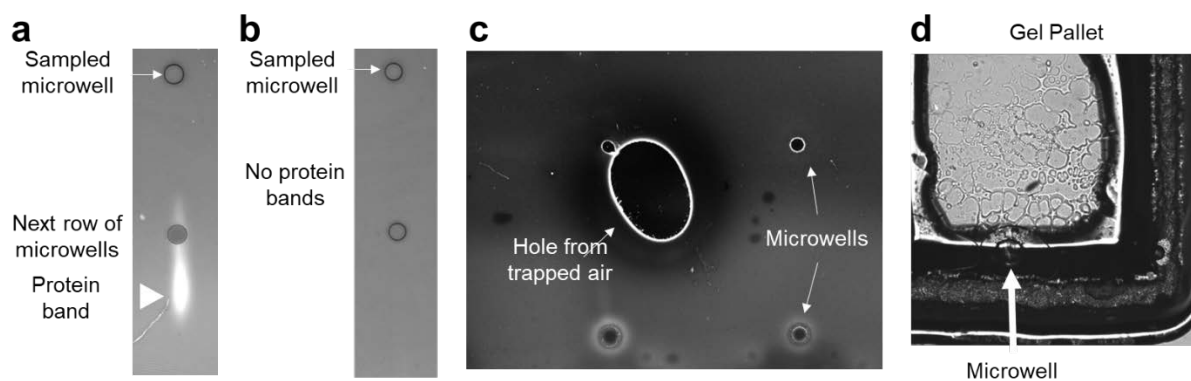

Supplementary Figure 4: Images for troubleshooting the procedure. (a) Fluorescence micrograph of protein band migrating too far, into the next row of microwells. (b) Fluorescence micrograph of microwell with no protein signal. (c) Fluorescence micrograph of snapBlot device with holes resulting from bubbles trapped during fabrication. (d) Bright field micrograph of gel pallet with microwell partially excised.
